# Supplementary material for: Impact of α-synuclein pathology on transplanted hESC-derived dopaminergic neurons in a humanized α-synuclein rat model of PD
Source: PubMed Central journal article supplement — Proc Natl Acad Sci U S A. 2020 Jun 15;117(26):15209–20. doi: 10.1073/pnas.2001305117 (PMC7334514; doi:10.1073/pnas.2001305117), 2020-06-15
Supplement: pnas.2001305117.sapp.pdf [file pnas.2001305117.sapp.pdf]

**A**

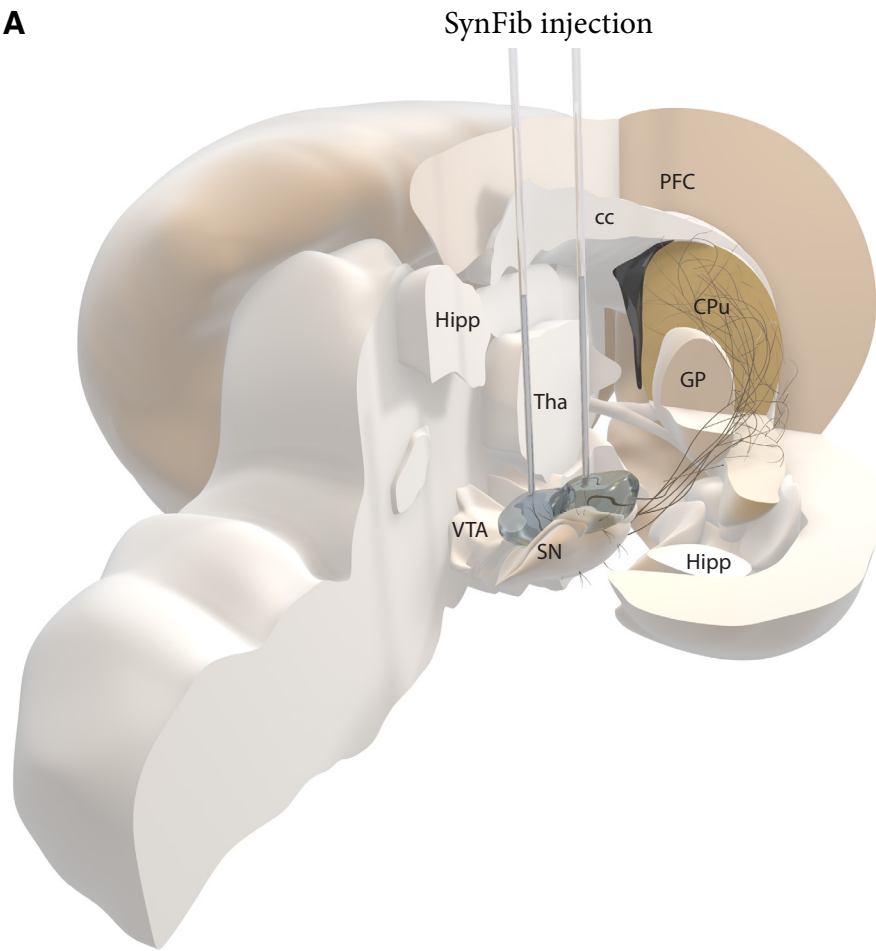

**Figure S1. Experimental design of SynFib model induction.**

Schematic of the brain shows the target sites in the substantia nigra used to simultaneously inject the AAV- $\alpha$ -syn and  $\alpha$ -syn PFFs.

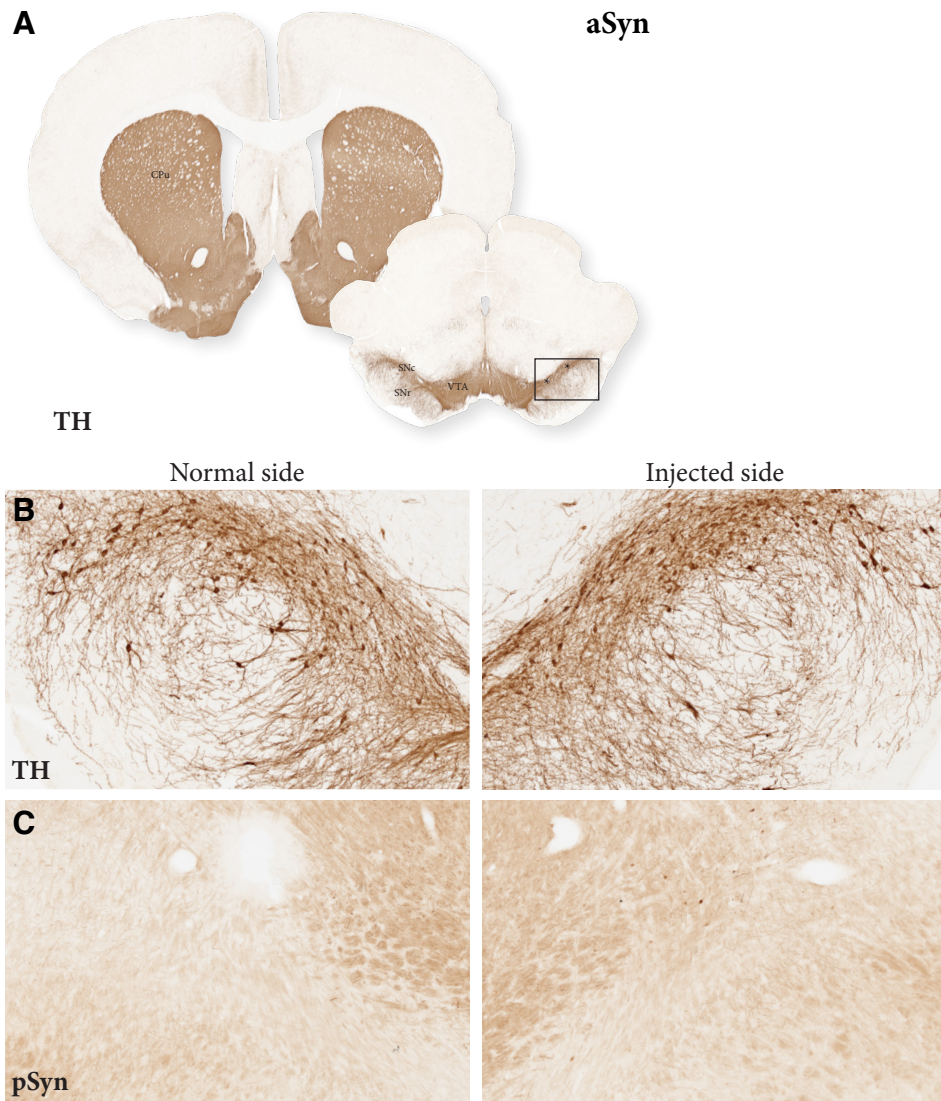

**Figure S2. (Supplementary to Figure 3) Minimal TH loss and pathology in the aSyn animals.**

In contrast to the extensive TH downregulation and pSyn expression observed in the STR and SN of SynFib animals (Fig 3), aSyn animals (that received AAV- $\alpha$ -syn alone) have minimal TH loss in the STR and SN (A,B) and pSyn expression in the SN (C), consistent with previous reports (1).

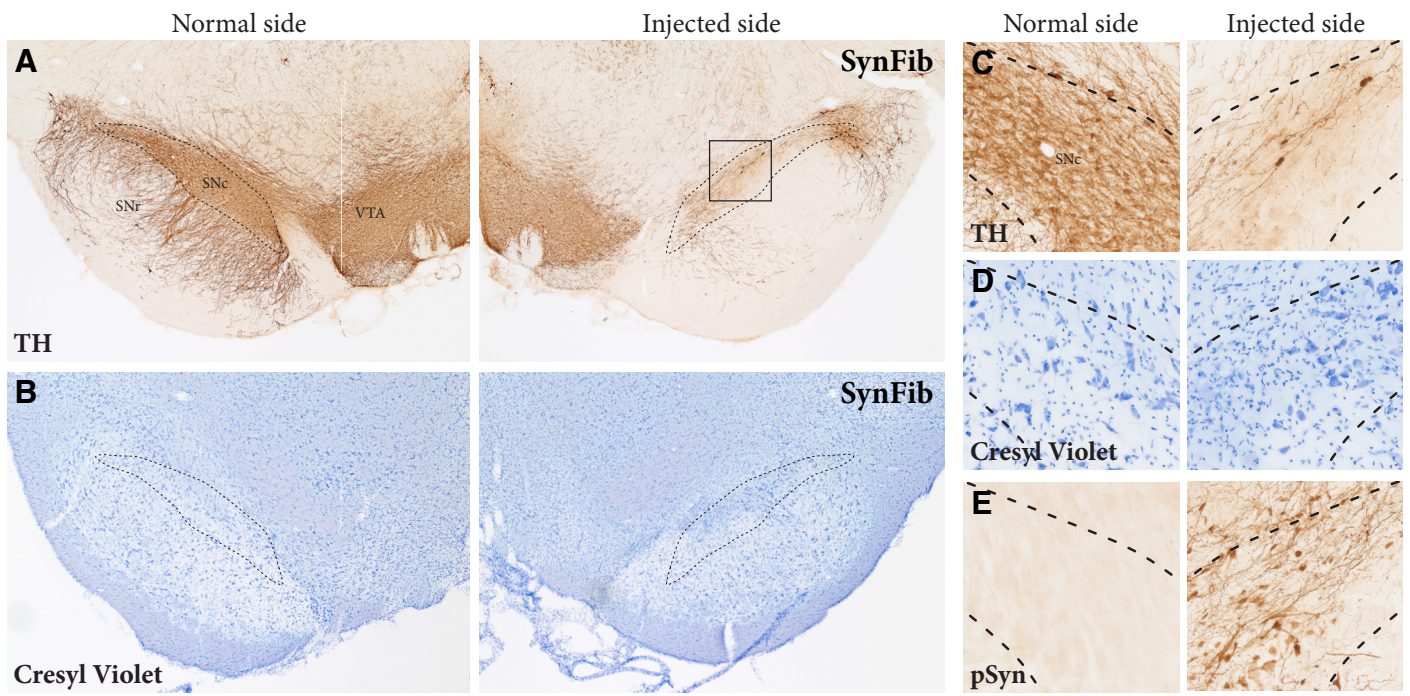

**Figure S3. (Supplementary to Figure 3) Downregulation of TH in the SynFib model.**

Representative images show reduced TH immunostaining (A,C) coupled with maintained cresyl violet (B,D) and pSyn (E) immunostaining in the SN indicating TH downregulation in the SynFib animals. In addition, a large number of nuclei are present in the SN (right in D) likely from the infiltration of microglia seen in Fig 2.

| Antigen             | Company         | Catalogue No. | Host       | Dilution |
|---------------------|-----------------|---------------|------------|----------|
| $\alpha$ -synuclein | Millipore       | ab5038        | Rabbit     | 1:1000   |
| Calbindin           | Swant           | CB38          | Rabbit     | 1:1000   |
| GFP                 | Abcam           | ab13970       | Chicken    | 1:1000   |
| Girk2               | Abcam           | ab65096       | Goat       | 1:500    |
| hNCAM               | Santa Cruz      | sc106         | Mouse      | 1:1000   |
| Iba1                | Wako            | 019-19741     | Rabbit     | 1:1000   |
| mCherry             | SICGEN          | ab0040-200    | Goat       | 1:1000   |
| Nurr1               | Abcam           | ab41917       | Mouse      | 1:500    |
| Pitx3               | Thomas Perlmann | Gift          | Guinea Pig | 1:500    |
| pSyn 81A            | Kelvin Luk      | Gift          | Mouse      | 1:10000  |
| pSyn129             | Abcam           | ab51253       | Rabbit     | 1:1000   |
| Stem121             | Takara          | 40410         | Mouse      | 1:300    |
| TH                  | Millipore       | ab152         | Rabbit     | 1:2000   |
| TH                  | Millipore       | ab1542        | Sheep      | 1:1000   |
| VMAT2               | Sigma           | V6637         | Guinea Pig | 1:2000   |

**Figure S4. Antibodies used in the study.**

The table shows the antigen, host and dilution used for each immunohistochemical staining in the study. The company and catalogue numbers are also included.

**Movie S1. (in .mp4 file, Supplementary to Fig. 2). pSyn pathology in the SynFib model.**

Extensive pSyn pathology was found in SynFib injected animals in the SN after 12 weeks. This was visualised using iDISCO clearing and staining as previously described (2) and light sheet microscopy, as described in the Materials and Methods. In this movie, we can see the large number of pSyn+ cell bodies at the site of injection in the SN. This pathology extends throughout the brain to form a dense network of pSyn+ fibers in the striatum.

**Supplementary References:**

- 1) Thakur, P., et al. Modeling Parkinson's disease pathology by combination of fibril seeds and alpha-synuclein overexpression in the rat brain. *Proc Natl Acad Sci U S A* 114, E8284-E8293 (2017).
- 2) Etessami, R., et al. Spread and pathogenic characteristics of a G-deficient rabies virus recombinant: an *in vitro* and *in vivo* study. *J Gen Virol* 81, 2147-2153 (2000).
